# Supplementary material for: Simple electrodeposition to synthesize a NiFeSx–modified Ti-Fe2O3 photoanode: an effective strategy to improve the photoelectrochemical water oxidation reaction
Source: Royal Society of Chemistry journal article supplement (doi:10.1039/d1dt02303a), 2021-01-01
Supplement: d1dt02303a1.pdf [file d1dt02303a1.pdf]

## **Electronic Supplementary Information**

### **A simple electrodeposition to synthesize NiFeS<sub>x</sub>-modified Ti-Fe<sub>2</sub>O<sub>3</sub> photoanode: an effective strategy to improve photoelectrochemical water oxidation reaction**

Haoyu Wang<sup>a</sup>, Rui Zhang<sup>a</sup>, YinYin Li<sup>a</sup>, Dejun Wang<sup>a</sup>, Yanhong Lin<sup>a</sup>, and Tengfeng Xie<sup>a</sup>,

\*

<sup>a</sup> College of Chemistry, Jilin University, Changchun, 130012, P. R. China

Email of corresponding author: [xietf@jlu.edu.cn](mailto:xietf@jlu.edu.cn)

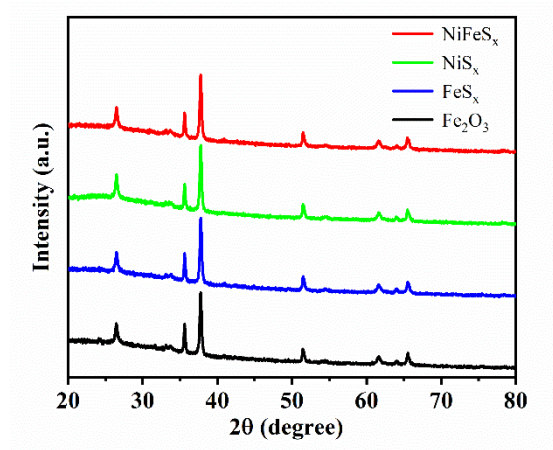

Figure S1 XRD patterns of Ti-Fe<sub>2</sub>O<sub>3</sub>/NiFeS<sub>x</sub>, Ti-Fe<sub>2</sub>O<sub>3</sub>/NiS<sub>x</sub>, Ti-Fe<sub>2</sub>O<sub>3</sub>/FeS<sub>x</sub> and Ti-Fe<sub>2</sub>O<sub>3</sub>.

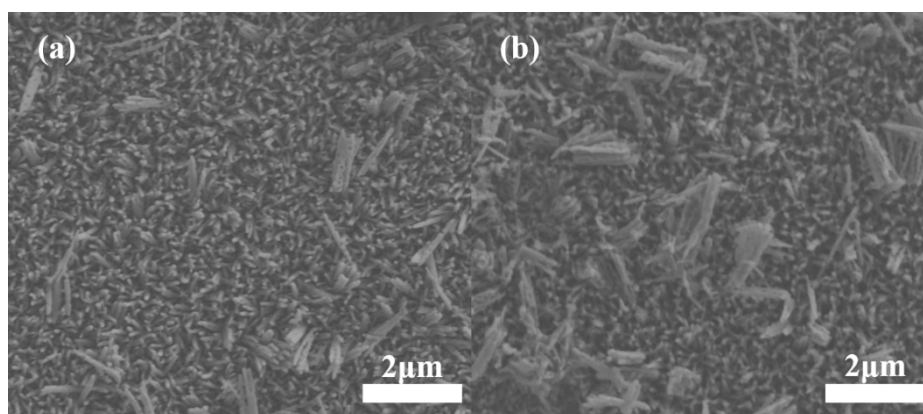

Figure S2 FE-SEM images of Ti-Fe<sub>2</sub>O<sub>3</sub> (a) and Ti-Fe<sub>2</sub>O<sub>3</sub>/NiFeS<sub>x</sub> (b).

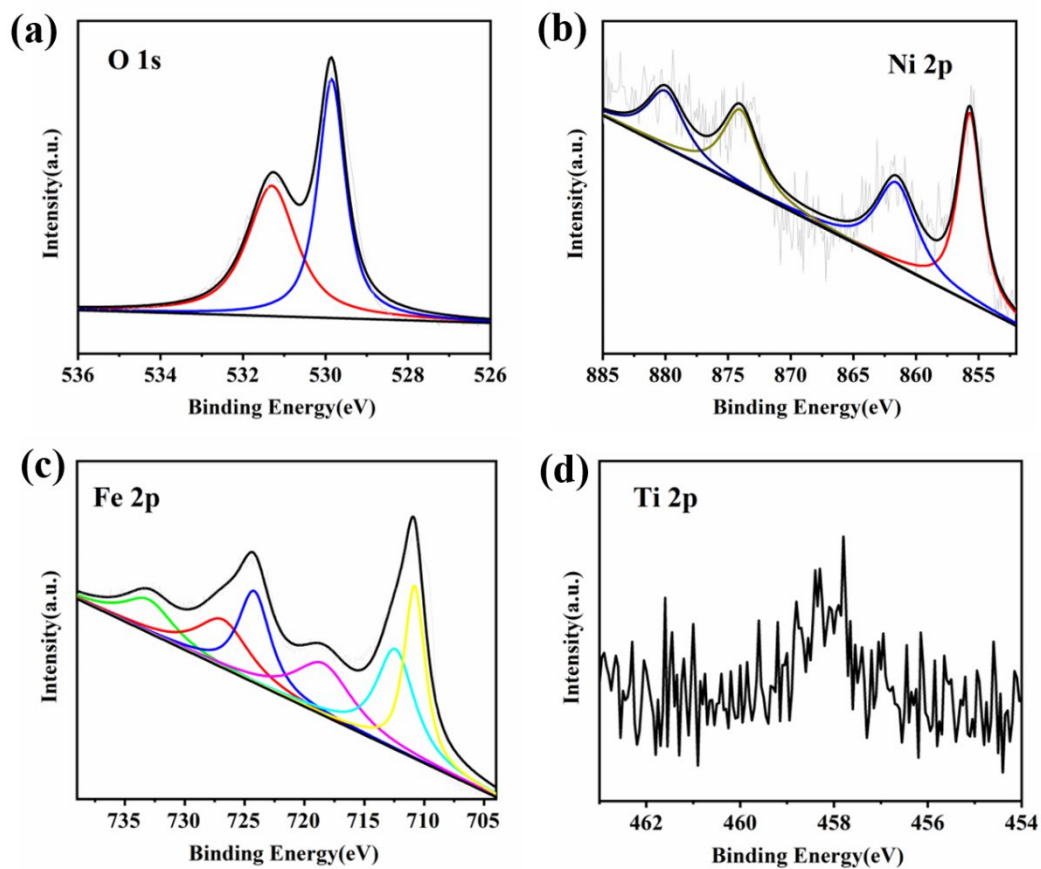

Figure S3 XPS spectrum of O 1s (a), Ni (2p), Fe (2p) and Ti (2p) for Ti-Fe<sub>2</sub>O<sub>3</sub>/NiFeS<sub>x</sub>.

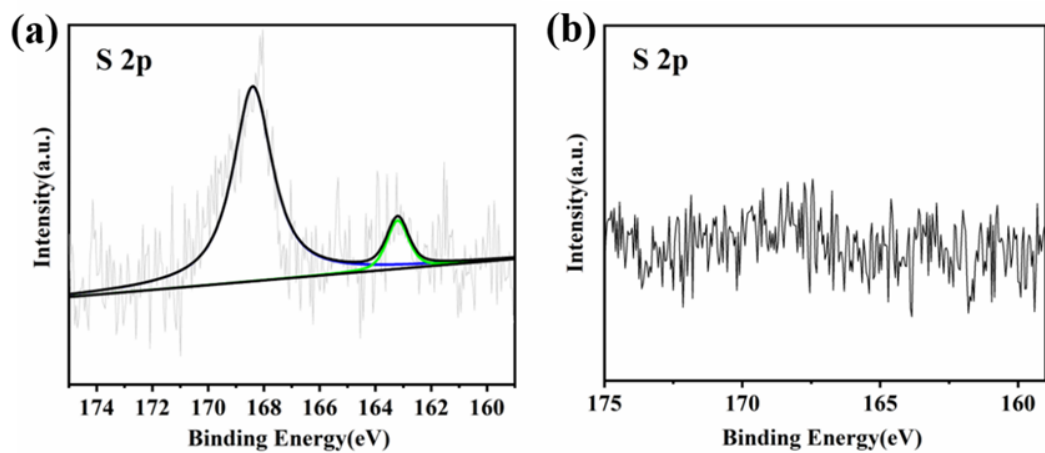

Figure S4 XPS spectrum of S 2p for Ti-Fe<sub>2</sub>O<sub>3</sub>/NiFeS<sub>x</sub>, before reaction (a), after reaction (b).

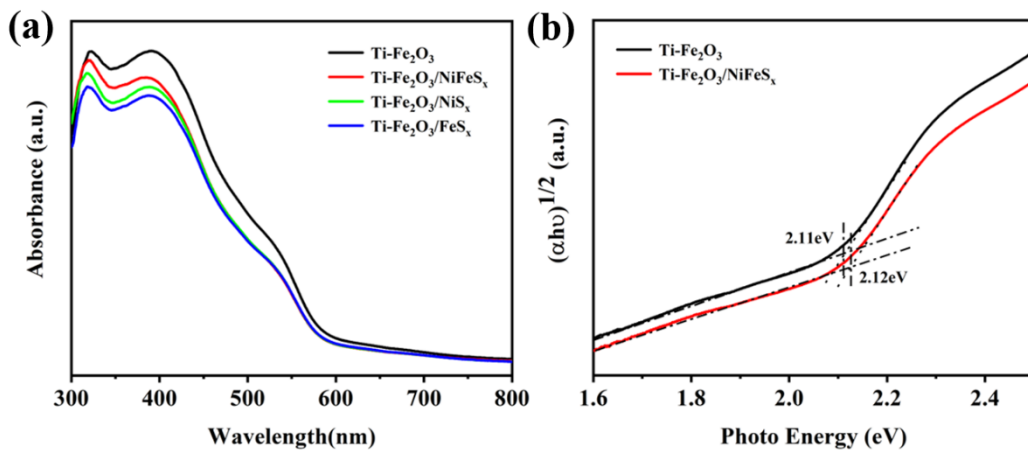

Figure S5 UV-vis absorption spectra (a) and the corresponding Tauc's plots (b) of Ti-Fe<sub>2</sub>O<sub>3</sub> and Ti-Fe<sub>2</sub>O<sub>3</sub>/NiFeS<sub>x</sub>.

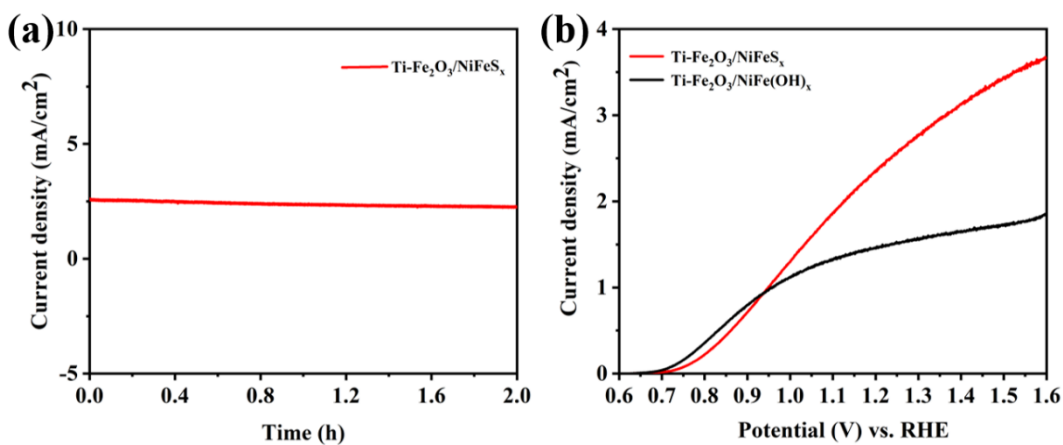

Figure S6 Photostability measurement of Ti-Fe<sub>2</sub>O<sub>3</sub>/NiFeS<sub>x</sub> at 1.23 V vs. RHE in 1 M KOH with one drop of Triton X-400 (a) and the photocurrent of Ti-Fe<sub>2</sub>O<sub>3</sub>/NiFeS<sub>x</sub> and Ti-Fe<sub>2</sub>O<sub>3</sub>/NiFe(OH)<sub>x</sub> (b).

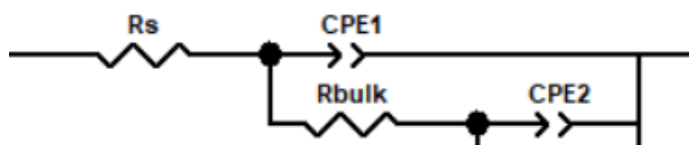

Figure S7 The equivalent circuit model for fitting Nyquist plots of photoanodes.

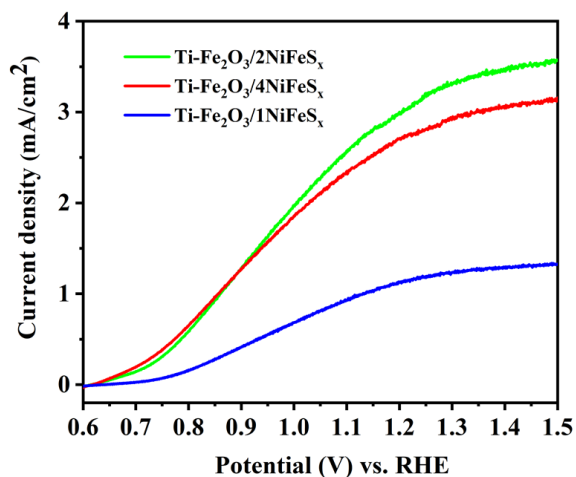

Figure S8 The photocurrent of Ti-Fe<sub>2</sub>O<sub>3</sub>/2NiFeS<sub>x</sub>, Ti-Fe<sub>2</sub>O<sub>3</sub>/4NiFeS<sub>x</sub> and Ti-Fe<sub>2</sub>O<sub>3</sub>/1NiFeS<sub>x</sub>.

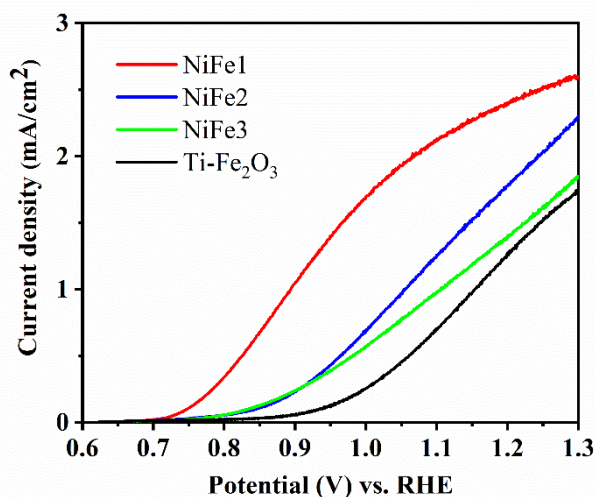

Figure S9 The photocurrent of NiFe1, NiFe2, NiFe3 and Ti-Fe<sub>2</sub>O<sub>3</sub>.

**Table S1** The fitted results of Nyquist plots for Ti-Fe<sub>2</sub>O<sub>3</sub> and Ti-Fe<sub>2</sub>O<sub>3</sub>/NiFeS<sub>x</sub>.

| Photoanode                                            | R <sub>Bulk</sub> (Ω) | CPE1 (Fcm <sup>-2</sup> ) | R <sub>ct</sub> (Ω) | CPE2 (Fcm <sup>-2</sup> ) |
|-------------------------------------------------------|-----------------------|---------------------------|---------------------|---------------------------|
| Ti-Fe <sub>2</sub> O <sub>3</sub> /NiFeS <sub>x</sub> | 96.86                 | 1.51×10 <sup>-5</sup>     | 446.9               | 3.18×10 <sup>-4</sup>     |
| Ti-Fe <sub>2</sub> O <sub>3</sub>                     | 156.9                 | 3.78×10 <sup>-5</sup>     | 1636                | 3.32×10 <sup>-4</sup>     |

**Table S2** Comparison of the photocurrent density of Fe<sub>2</sub>O<sub>3</sub> in literature with our result under AM 1.5 G illumination

| Composite                                                                       | Photocurrent density at 1.23V vs. RHE | Electrolyte | Ref |
|---------------------------------------------------------------------------------|---------------------------------------|-------------|-----|
| Fe <sub>2</sub> O <sub>3</sub> /C <sub>3</sub> N <sub>4</sub> /CoO <sub>x</sub> | 1.50 mA/cm <sup>2</sup>               | 1 M NaOH    | [1] |
| Ti-Fe <sub>2</sub> O <sub>3</sub> /FeP                                          | 3.9 mA/cm <sup>2</sup>                | 1 M KOH     | [2] |

|                                                                          |                               |                   |                             |
|--------------------------------------------------------------------------|-------------------------------|-------------------|-----------------------------|
| <b>Fe<sub>2</sub>O<sub>3</sub>/NiOOH</b>                                 | <b>1.64 mA/cm<sup>2</sup></b> | <b>1 M NaOH</b>   | <b>[3]</b>                  |
| <b>Fe<sub>2</sub>O<sub>3</sub>/FeB/CoPi</b>                              | <b>1.9 mA/cm<sup>2</sup></b>  | <b>1 M NaOH</b>   | <b>[4]</b>                  |
| <b>Fe<sub>2</sub>O<sub>3</sub>/Vo/CoPi</b>                               | <b>3 mA/cm<sup>2</sup></b>    | <b>1 M NaOH</b>   | <b>[5]</b>                  |
| <b>NiCoAl-LDH/ Fe<sub>2</sub>O<sub>3</sub></b>                           | <b>2.56 mA/cm<sup>2</sup></b> | <b>0.5 M K-Pi</b> | <b>[6]</b>                  |
| <b>SiO<sub>x</sub>/np-Fe<sub>2</sub>O<sub>3</sub></b>                    | <b>2.44 mA/cm<sup>2</sup></b> | <b>1 M NaOH</b>   | <b>[7]</b>                  |
| <b>Ti-Fe<sub>2</sub>O<sub>3</sub>-FeOOH</b>                              | <b>2.31 mA/cm<sup>2</sup></b> | <b>1 M KOH</b>    | <b>[8]</b>                  |
| <b>Ti-Fe<sub>2</sub>O<sub>3</sub>/Ni(OH)<sub>2</sub>/IrO<sub>2</sub></b> | <b>2.2 mA/cm<sup>2</sup></b>  | <b>1 M NaOH</b>   | <b>[9]</b>                  |
| <b>Ti-Fe<sub>2</sub>O<sub>3</sub>/NiFeS<sub>x</sub></b>                  | <b>3mA/cm<sup>2</sup></b>     | <b>1 M KOH</b>    | <b>In<br/>this<br/>work</b> |

**Table S3** Photocurrent of 10NiFeS<sub>x</sub>/Ti-Fe<sub>2</sub>O<sub>3</sub> under AM 1.5 G illumination

| <b>Composite</b>                                        | <b>Photocurrent density at 1.23V vs. RHE</b> |
|---------------------------------------------------------|----------------------------------------------|
| 1NiFeS <sub>x</sub> /Ti-Fe <sub>2</sub> O <sub>3</sub>  | 3.03 mA/cm <sup>2</sup>                      |
| 2NiFeS <sub>x</sub> /Ti-Fe <sub>2</sub> O <sub>3</sub>  | 3.00 mA/cm <sup>2</sup>                      |
| 3NiFeS <sub>x</sub> /Ti-Fe <sub>2</sub> O <sub>3</sub>  | 2.99 mA/cm <sup>2</sup>                      |
| 4NiFeS <sub>x</sub> /Ti-Fe <sub>2</sub> O <sub>3</sub>  | 3.02 mA/cm <sup>2</sup>                      |
| 5NiFeS <sub>x</sub> /Ti-Fe <sub>2</sub> O <sub>3</sub>  | 2.96 mA/cm <sup>2</sup>                      |
| 6NiFeS <sub>x</sub> /Ti-Fe <sub>2</sub> O <sub>3</sub>  | 2.93 mA/cm <sup>2</sup>                      |
| 7NiFeS <sub>x</sub> /Ti-Fe <sub>2</sub> O <sub>3</sub>  | 2.91 mA/cm <sup>2</sup>                      |
| 8NiFeS <sub>x</sub> /Ti-Fe <sub>2</sub> O <sub>3</sub>  | 2.89 mA/cm <sup>2</sup>                      |
| 9NiFeS <sub>x</sub> /Ti-Fe <sub>2</sub> O <sub>3</sub>  | 2.86mA/cm <sup>2</sup>                       |
| 10NiFeS <sub>x</sub> /Ti-Fe <sub>2</sub> O <sub>3</sub> | 2.98 mA/cm <sup>2</sup>                      |

## REFERENCE

- [1] Z. Mei, Y. Li, X. Yang, W. Ren, S. Tong, N. Zhang, W. Zhao, Y. Lin, F. Pan, Tuning nanosheet Fe<sub>2</sub>O<sub>3</sub> photoanodes with C<sub>3</sub>N<sub>4</sub> and p-type CoO<sub>x</sub> decoration for efficient and stable water splitting, *Cata. Sci. Tec*, 8 (2018) 3144-3150.
- [2] Q. Bu, S. Li, Q. Wu, Y. Lin, D. Wang, X. Zou, T. Xie, In situ synthesis of FeP-decorated Ti-Fe<sub>2</sub>O<sub>3</sub>: an effective strategy to improve the interfacial charge transfer in the photoelectrochemical water oxidation reaction, *Cata. Sci. Tech.*, 9 (2019) 5812-5818.
- [3] A.G. Tamirat, W.-N. Su, A.A. Dubale, H.-M. Chen, B.-J. Hwang, Photoelectrochemical water splitting at low applied potential using a NiOOH coated codoped (Sn, Zr) α-Fe<sub>2</sub>O<sub>3</sub> photoanode, *J. Mater. Chem. A*, 3 (2015) 5949-5961.
- [4] A. Liao, H. He, Z. Fan, G. Xu, L. Li, J. Chen, Q. Han, X. Chen, Y. Zhou, Z. Zou, Facile room-temperature surface modification of unprecedented FeB co-catalysts on Fe<sub>2</sub>O<sub>3</sub> nanorod photoanodes for high photoelectrochemical performance, *J. Cata.*, 352 (2017) 113-119.
- [5] C. Zhu, C. Li, M. Zheng, J.J. Delaunay, Plasma-Induced Oxygen Vacancies in Ultrathin Hematite Nanoflakes Promoting Photoelectrochemical Water Oxidation, *ACS Appl. Mater. Interfaces*, 7 (2015) 22355-22363.
- [6] G. Wang, B. Wang, C. Su, D. Li, L. Zhang, R. Chong, Z. Chang, Enhancing and stabilizing α-Fe<sub>2</sub>O<sub>3</sub> photoanode towards neutral water oxidation: Introducing a dual-functional NiCoAl layered double

hydroxide overlayer, *J. Catal.*, 359 (2018) 287-295.

[7] H.J. Ahn, K.Y. Yoon, M.J. Kwak, J.H. Jang, A Titanium-Doped SiO<sub>x</sub> Passivation Layer for Greatly Enhanced Performance of a Hematite-Based Photoelectrochemical System, *Angew. Chem. Int. Ed. Engl.*, 55 (2016) 9922-9926.

[8] Y. Yuan, J. Gu, K.H. Ye, Z. Chai, X. Yu, X. Chen, C. Zhao, Y. Zhang, W. Mai, Combining Bulk/Surface Engineering of Hematite To Synergistically Improve Its Photoelectrochemical Water Splitting Performance, *ACS. Appl. Mater. Interfaces.*, 8 (2016) 16071-16077.

[9] Z. Wang, G. Liu, C. Ding, Z. Chen, F. Zhang, J. Shi, C. Li, Synergetic Effect of Conjugated Ni(OH)<sub>2</sub>/IrO<sub>2</sub> Cocatalyst on Titanium-Doped Hematite Photoanode for Solar Water Splitting, *J. Phys. Chem. C*, 119 (2015) 19607-19612.
